# Supplementary material
Source: PubMed Central journal article supplement (PMC6395930)
Supplement: AAC.01879-18-s0001.pdf [file AAC.01879-18-s0001.pdf]

## Supplemental Materials

### Synthesis Methods

**General Methods.** Commercially available reagents and solvents were used without further purification unless stated otherwise. LC-MS analyses were performed on an Agilent 1100 HPLC coupled to an Agilent G1946C electrospray mass spectrometer in positive ion mode with scan range was 100-1000d. Preparative normal phase chromatography was performed on a CombiFlash Rf+ (Teledyne Isco) with pre-packed RediSep Rf silica gel cartridges. Preparative reverse phase HPLC was performed on a CombiFlash Rf+ (Teledyne Isco) equipped with RediSep Rf Gold pre-packed C18 cartridges and an acetonitrile/water/0.05% TFA gradient. The purity of tested compounds was  $\geq 95\%$  as determined by HPLC analysis conducted on an Agilent 1100 system using a reverse phase C18 column with diode array detector unless stated otherwise. NMR spectra were recorded on a Bruker 400 MHz spectrometer. The signal of the deuterated solvent was used as internal reference. Chemical shifts ( $\delta$ ) are given in ppm and are referenced to residual not fully deuterated solvent signal. Coupling constants (J) are given in Hz.

Compounds #125, 126, and 127 were synthesized as described by Summa and coworkers.<sup>1</sup> Compounds #148, 151, 152, 154, and 155 were synthesized as previously described by Williams and coworkers.<sup>2</sup> Synthesis of novel compounds #121, 149, 150 and 153 are described below.

**N-[(4-fluorophenyl)methyl]-5-hydroxy-1-methyl-6-oxo-2-[2-(phenylformamido)propan-2-yl]-1,6-dihydropyrimidine-4-carboxamide (#121).** A mixture of 2-(2-aminopropan-2-yl)-N-[(4-fluorophenyl)methyl]-5-hydroxy-1-methyl-6-oxo-1,6-dihydropyrimidine-4-carboxamide (50 mg, 0.150 mmol; ArkPharm), benzoic acid (37 mg, 0.299 mmol), EDC hydrochloride (57 mg, 0.299 mmol), and HOBT hydrate (57 mg, 0.299 mmol) in DCM (1 mL) was treated with DIEA (52  $\mu$ L, 0.299 mmol). The reaction was quenched after 7 h with two drops of water and concentrated under a stream of air overnight. The reaction was purified by reverse phase HPLC (10 to 80% acetonitrile/water/0.05% TFA). A precipitate formed upon concentration of the purified fractions. The precipitate was filtered and washed with water to give the title compound as a white solid (32.9 mg, 50%). HPLC purity 97%. LCMS ES+ m/z 439 (M+H)<sup>+</sup>, 461 (M+Na)<sup>+</sup>.

**4-[(4-bromophenyl)methyl]-1-hydroxy-1,2-dihydro-1,8-naphthyridin-2-one hydrobromide (#149).** Step 1. 1-Benzyloxy-2-oxo-1,8-naphthyridin-4-yl) trifluoromethanesulfonate (0.500 g, 1.25 mmol; Example 103 Step 1 in Williams et al.<sup>2</sup>) was added to a microwave vessel with THF (10 mL). The vessel was sparged with nitrogen for 5 min and then tetrakis(triphenylphosphine)palladium(0) (72 mg, 0.062 mmol) was added. The vessel was crimped shut and sparged again for 5 minutes using nitrogen. Bromo-[(4-bromophenyl)methyl]zinc (5 mL of a 0.5 M solution in THF) was added via syringe and the reaction was irradiated at 110 °C for 10 minutes using microwaves. TLC in 35% EtOAc/hexanes indicated the reaction to be complete. The reaction was taken up in EtOAc and washed using 1N HCl and then saturated brine. The EtOAc layer was dried over sodium sulfate, filtered and evaporated to give 1.18 g of crude product as a yellow oil. The material was chromatographed on 12 g of silica (linear gradient from 5% EtOAc/hexanes up to 60% EtOAc/hexanes over 12 minutes). Pure fractions were pooled and evaporated to furnish 1-benzyloxy-4-[(4-bromophenyl)methyl]-1,8-naphthyridin-2-one as an off-white solid (220 mg; 41% yield). LCMS ES+ m/z 421, 423 (M+H)<sup>+</sup>. Step 2. A round bottom flask was charged with 1-benzyloxy-4-[(4-bromophenyl)methyl]-1,8-naphthyridin-2-one (75 mg, 0.17 mmol), 33% HBr in HOAc (1 mL) and water (0.3 mL). The reaction was heated to 80 °C for 2 hours. After 2 h, the mixture was cooled to room temperature and water was added. The precipitate was filtered, rinsed using additional

water and dried under high vacuum overnight to furnish the title compound as a tan solid (54 mg; 74% yield). <sup>1</sup>H NMR (400 MHz, DMSO-*d*<sub>6</sub>) δ ppm 9.97 (br. s., 2 H), 8.63 - 8.68 (m, 1 H), 8.30 (dd, J=8.1, 1.7 Hz, 1 H), 7.49 - 7.55 (m, 2 H), 7.32 - 7.36 (m, 1 H), 7.27 - 7.31 (m, 2 H), 6.60 (s, 1 H), 4.24 (s, 2 H). HPLC purity 95%. LCMS ES+ m/z 331, 333 (M+H)<sup>+</sup>.

**4-{{[4'-(aminomethyl)-[1,1'-biphenyl]-4-yl]methyl}-2,8-dihydro-1,8-naphthyridin-2-one hydrobromide (#150).** Step 1. To a 5 mL microwave vial was added: 1-benzyloxy-4-[(4-bromophenyl)methyl]-1,8-naphthyridin-2-one (132 mg, 0.31 mmol; from Step 1 of the procedure for #149), DMF (5 mL) and water (1 mL). [4-[(tert-butoxycarbonylamino)methyl]phenyl]boronic acid (164 mg, 0.63 mmol), potassium carbonate (130 mg; 0.94 mmol) and Pd(dppf)Cl<sub>2</sub> (13 mg; 0.05 %) were added. The vessel was crimped shut and sparged using nitrogen for 10 minutes. The vessel was irradiated at 100 °C for 10 minutes. LC-MS analysis indicated a mixture of *tert*-butyl ((4'-((1-(benzyloxy)-2-oxo-1,2-dihydro-1,8-naphthyridin-4-yl)methyl)-[1,1'-biphenyl]-4-yl)methyl)carbamate and des-*O*-benzylated product *tert*-butyl ((4'-((2-oxo-1,2-dihydro-1,8-naphthyridin-4-yl)methyl)-[1,1'-biphenyl]-4-yl)methyl)carbamate. The reaction was taken up in EtOAc and washed using 1N HCl, saturated sodium bicarbonate and then brine. The EtOAc layer was dried (sodium sulfate), filtered and evaporated to give 0.29 g of the crude mixture. Step 2. The crude mixture (0.29 g) was taken up in 2 mL HBr in HOAc (33%) with water (0.5 mL) and heated to 80 °C for 30 min to give primarily the des-*O*-benzylated product. Repeated trituration from MeOH and MeCN gave the title compound 4-{{[4'-(aminomethyl)-[1,1'-biphenyl]-4-yl]methyl}-2,8-dihydro-1,8-naphthyridin-2-one hydrobromide as a tan solid (50 mg, 28%). <sup>1</sup>H NMR (400 MHz, DMSO-*d*<sub>6</sub>) δ ppm 12.07 (s, 1 H), 8.51 (d, J=3.4 Hz, 1 H), 8.26 (d, J=7.8 Hz, 1 H), 8.17 (br. s., 3H), 7.73 (d, J=8.3 Hz, 2 H), 7.66 (d, J=8.1 Hz, 2 H), 7.54 (d, J=8.1 Hz, 2 H), 7.43 (d, J=8.3 Hz, 2 H), 7.24 (dd, J=7.7, 4.8 Hz, 1 H), 6.40 (s, 1 H), 4.27 (s, 2 H), 4.08 (br. s., 2 H). HPLC purity 95%. LCMS ES+ m/z 342 (M+H)<sup>+</sup>.

**4-{{[3'-(aminomethyl)-[1,1'-biphenyl]-4-yl]methyl}-1-hydroxy-1,2-dihydro-1,8-naphthyridin-2-one trifluoroacetate (#153).** Step 1. To a microwave vial was added 1-benzyloxy-4-[(4-bromophenyl)methyl]-1,8-naphthyridin-2-one (256 mg; from Step 1 of the procedure for #149) and anhydrous THF (7 mL). [3-[(tert-butoxycarbonylamino)methyl]phenyl]boronic acid (317 mg), cesium acetate (350 mg) and tetrakis(triphenylphosphine)palladium(0) (35 mg) were added. The vessel was crimped shut and sparged using nitrogen for 10 minutes. The vessel was irradiated at 90 °C for 20 minutes. The reaction was taken up in EtOAc and washed using water, then brine. The EtOAc layer was dried (sodium sulfate), filtered and evaporated to give 0.265 g of crude material as a yellow solid. The material was chromatographed on 40 g of silica (10-80% EtOAc/hexanes) to yield *tert*-butyl N-[[3-[4-[(1-benzyloxy-2-oxo-1,8-naphthyridin-4-yl)methyl]phenyl]phenyl]methyl]carbamate as a clear oil (75 mg, 38% yield). LCMS ES+ m/z 570 (M+Na)<sup>+</sup>. Step 2. A round bottom flask was charged with *tert*-butyl N-[[4-[4-[(1-benzyloxy-2-oxo-1,8-naphthyridin-4-yl)methyl]phenyl]phenyl]methyl]carbamate (75 mg), HBr in HOAc (2 mL of 33% w/w) and water (1 mL) and heated to 80 °C for 3 h. The reaction was evaporated to give 0.139 g of crude material which was chromatographed on a 120 g C-18 column (5%-40% MeCN/water/0.05% TFA) to yield a deep yellow oil which was lyophilized from 1mL MeCN and 3 mL water to obtain the title compound 4-[[4-[4-(aminomethyl)phenyl]phenyl]methyl]-1-hydroxy-1,8-naphthyridin-2-one trifluoroacetate as a yellow foam (32 mg, 67% yield). <sup>1</sup>H NMR (400 MHz, DMSO-*d*<sub>6</sub>) δ ppm 10.94 (br. s., 1 H), 8.61 - 8.73 (m, 1 H), 8.34 (dd, J=7.9, 1.6 Hz, 1 H), 8.17 (br. s., 2 H), 7.78 (s, 1 H), 7.61 - 7.72 (m, 3 H), 7.51 (dd, J=7.6 Hz, 1 H), 7.40 - 7.49 (m, 3 H), 7.34 (dd, J=8.1, 4.6 Hz, 1 H), 6.60 (s, 1 H), 4.31 (s, 2 H), 4.11 (d, J=5.6 Hz, 2 H). HPLC purity 98%. LCMS ES+ m/z 358 (M+H)<sup>+</sup>.

## References

1. Summa, V.; Petrocchi, A.; Bonelli, F.; Crescenzi, B.; Donghi, M.; Ferrara, M.; Fiore, F.; Gardelli, C.; Gonzalez Paz, O.; Hazuda, D. J.; Jones, P.; Kinzel, O.; Laufer, R.; Monteagudo, E.; Muraglia, E.; Nizi, E.; Orvieto, F.; Pace, P.; Pescatore, G.; Scarpelli, R.; Stillmock, K.; Witmer, M. V.; Rowley, M., Discovery of raltegravir, a potent, selective orally bioavailable HIV-integrase inhibitor for the treatment of HIV-AIDS infection. *J Med Chem* **2008**, *51* (18), 5843-55.
2. Williams, P. D.; Venkatraman, S.; Langford, H. M.; Kim, B.; Booth, T. M.; Grobler, J. A.; Staas, D.; Ruzek, R. D.; Embrey, M. W.; Wiscount, C. M.; Lyle, T. A. 1-Hydroxynaphthyridine Compounds as Anti-HIV Agents. 24 January 2008, WO2008/010964 A1.

**Table S1. Compounds used in the study.**

| Compound | Structure | Formal Name                  |
|----------|-----------|------------------------------|
| 1        |           | TRC 939800 ("D")             |
| 2        |           | Sigma 74540                  |
| 3        |           | Sigma n8164                  |
| 4        |           | TimTec ST029023              |
| 5        |           | Enamine T0506-3483           |
| 7        |           | Idofine 02030                |
| 9        |           | Sigma 70050                  |
| 10       |           | Selleck S2001 (Elvitegravir) |
| 11       |           | Selleck S2005 (Raltegravir)  |
| 12       |           | Napthyridin-one              |
| 19       |           | Sigma 586862                 |
| 20       |           | Sigma - L133671              |
| 23       |           | Sigma - 28605                |
| 34       |           | Indofine-D-009               |
| 49       |           | Nootkatin                    |
| 50       |           | 5-nitrosotropolone           |
| 51       |           | tropolone p-nitrobenzoate    |
| 52       |           | NSC 79556                    |
| 54       |           | 3-bromotropolone             |
| 60       |           | Chembridge 5942159           |
| 62       |           | Chembridge 5946384           |
| 64       |           | Sigma CDS015295              |
| 65       |           | Sigma O0877                  |
| 67       |           | Sigma 17850                  |

|                                                   |                                                                                     |                                       |
|---------------------------------------------------|-------------------------------------------------------------------------------------|---------------------------------------|
| 68                                                | 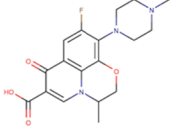   | Sigma<br>O8757                        |
| 69                                                |    | Sigma<br>R747092                      |
| 121                                               |    | CWHM-<br>000527                       |
| 125                                               |    | CWHM-<br>000555                       |
| 126                                               |    | CWHM-<br>000556                       |
| 127                                               |    | CWHM-<br>000557                       |
| 128                                               |   | Aldrichsele<br>ct CNC_ID<br>100615760 |
| 129                                               |  | Aldrichsele<br>ct CNC_ID<br>249465147 |
| 130                                               |  | Aldrichsele<br>ct CNC_ID<br>343616947 |
| 132                                               |  | Aldrichsele<br>ct CNC_ID<br>389306767 |
| <u>134</u><br>(#134 and #<br>158 are<br>tautomer) |  | Aldrichsele<br>ct CNC_ID<br>110964023 |
| 135                                               |  | Aldrichsele<br>ct CNC_ID<br>361173301 |

|     |                                                                                       |                                       |
|-----|---------------------------------------------------------------------------------------|---------------------------------------|
| 136 | 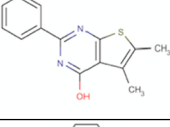   | Aldrichsele<br>ct CNC_ID<br>187741800 |
| 138 |    | Sigma<br>H53704                       |
| 139 |    | Sigma<br>130672                       |
| 148 |    | CWHM-<br>000613                       |
| 149 |    | CWHM-<br>000614                       |
| 150 |   | CWHM-<br>000615                       |
| 151 |  | CWHM-<br>000616                       |
| 152 |  | CWHM-<br>000617                       |
| 153 |  | CWHM-<br>000631                       |
| 154 |  | CWHM-<br>000632                       |
| 155 |  | CWHM-<br>000633                       |
| 156 |  | Sigma<br>465119,<br>Baicalein         |
| 157 |  | Sigma<br>C80105,<br>Chrysin           |

|                                     |                                                                                     |                             |
|-------------------------------------|-------------------------------------------------------------------------------------|-----------------------------|
| 158<br>(#134 and #158 are tautomer) | 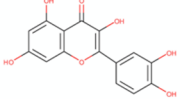   | Sigma Q4951, Quercetin      |
| 197                                 |    | Benzoylene-urea             |
| 198                                 |    | 2,3-dihydroxy-quinoxaline   |
| 200                                 |    | Anthragallo I               |
| 201                                 |    | Scutellarein                |
| 202                                 |    | Baicalin                    |
| 203                                 |    | TRC 700465                  |
| 204                                 |   | AK-830/13217 043            |
| 205                                 |  | AH-034/32461 056            |
| 206                                 |  | AJ-333/25006 202            |
| 207                                 |  | AB-131/40221 933            |
| 208                                 |  | Sun B8155                   |
| 209                                 |  | 2,3-Dihydroxynaphthoquinone |
| 214                                 |  | Sigma D5564                 |
| 215                                 |  | Sigma 576441                |

|     |                                                                                       |                                        |
|-----|---------------------------------------------------------------------------------------|----------------------------------------|
| 217 | 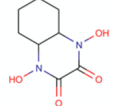   | Visas M Lab 444035142                  |
| 218 |    | Aldrichselect                          |
| 304 |    | 2-SO3H-8-PhDBTOO                       |
| 307 |    | 2-(Phenylsulfonyl)-1,3-cycloheptadiene |
| 321 |    | AMS 149974043                          |
| 322 |   | AMS 239435306                          |
| 323 |  | AMS 388708402                          |
| 324 |  | AMS 295104760                          |
| 325 |  | AMS 295182442                          |
| 326 |  | CPHM                                   |
| 327 |  | AMS 444085867                          |

|     |                                                                                     |                        |
|-----|-------------------------------------------------------------------------------------|------------------------|
| 328 | 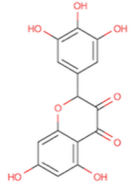   | Myricetin              |
| 329 |    | Emodin                 |
| 338 |    | Specs AN-584/43416 481 |
| 339 |    | Specs AA-504/34235 011 |
| 340 |    | Specs AP-355/40633 884 |
| 341 |   | Specs AP-355/40802 214 |
| 342 |  | Specs AP-355/40633 885 |
| 343 |  | Specs AP-355/42609 671 |
| 344 |  | Specs AP-355/42609 657 |
| 345 |  | Specs AP-355/40810 250 |

|     |                                                                                       |                         |
|-----|---------------------------------------------------------------------------------------|-------------------------|
| 346 | 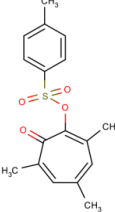   | Specs AG-690/13416 737  |
| 348 |    | MolPort-007-556-276     |
| 349 |    | MolPort-002-899-110     |
| 350 |    | MolPort-002-514-431     |
| 352 |    | Labotest LT0011262 2    |
| 353 |   | Visas-M Labs STK35858 5 |
| 354 |  | ChemDiv 5271-0027       |
| 355 |  | Visas-M Labs STK60515 1 |
| 356 |  | Visas-M Labs STK65869 1 |
| 357 |  | Visas-M Labs STK66385 0 |
